# Supplementary material for: Relative Validity of the HELIUS Food Frequency Questionnaire for Measuring Dietary Intake in Older Adult Participants of the Longitudinal Aging Study Amsterdam
Source: MDPI journal article supplement (doi:10.3390/nu12071998), 2020-07-05
Supplement: s1 [file s1]

Table S1. Mean intake (standard deviation) of energy, macronutrients and dietary fibre based on the FFQ of the 88 validation study participants (those with a completed food frequency questionnaire as well as three 24-hour dietary recalls) and all 1399 participants (those with complete food frequency questionnaire data) of the Longitudinal Aging Study Amsterdam.

| <b>Characteristic</b>   | <b>Validation sample</b> | <b>Total FFQ sample</b> |
|-------------------------|--------------------------|-------------------------|
| N                       | 88                       | 1399                    |
| Energy (kcal)           | 2097 (579)               | 2100 (582)              |
| Total carbohydrates (g) | 212.0 (72.7)             | 214.8 (66.7)            |
| Mono/di-saccharides (g) | 102.2 (47.3)             | 100.8 (40.5)            |
| Total protein (g)       | 81.1 (24.2)              | 79.9 (23.7)             |
| Total fat (g)           | 80.5 (28.9)              | 80.4 (28.4)             |
| Dietary fibre (g)       | 22.2 (7.0)               | 22.9 (7.2)              |

FFQ=food frequency questionnaire
